# Supplementary material for: LKB1 and STRAD Promote Epithelial Ovarian Cancer Spheroid Cell Invasion
Source: Preprints.org preprint supplement (doi:10.20944/preprints202409.0763.v1), 2024-09-10
Supplement: Supplementary file 2 [file supplementary]

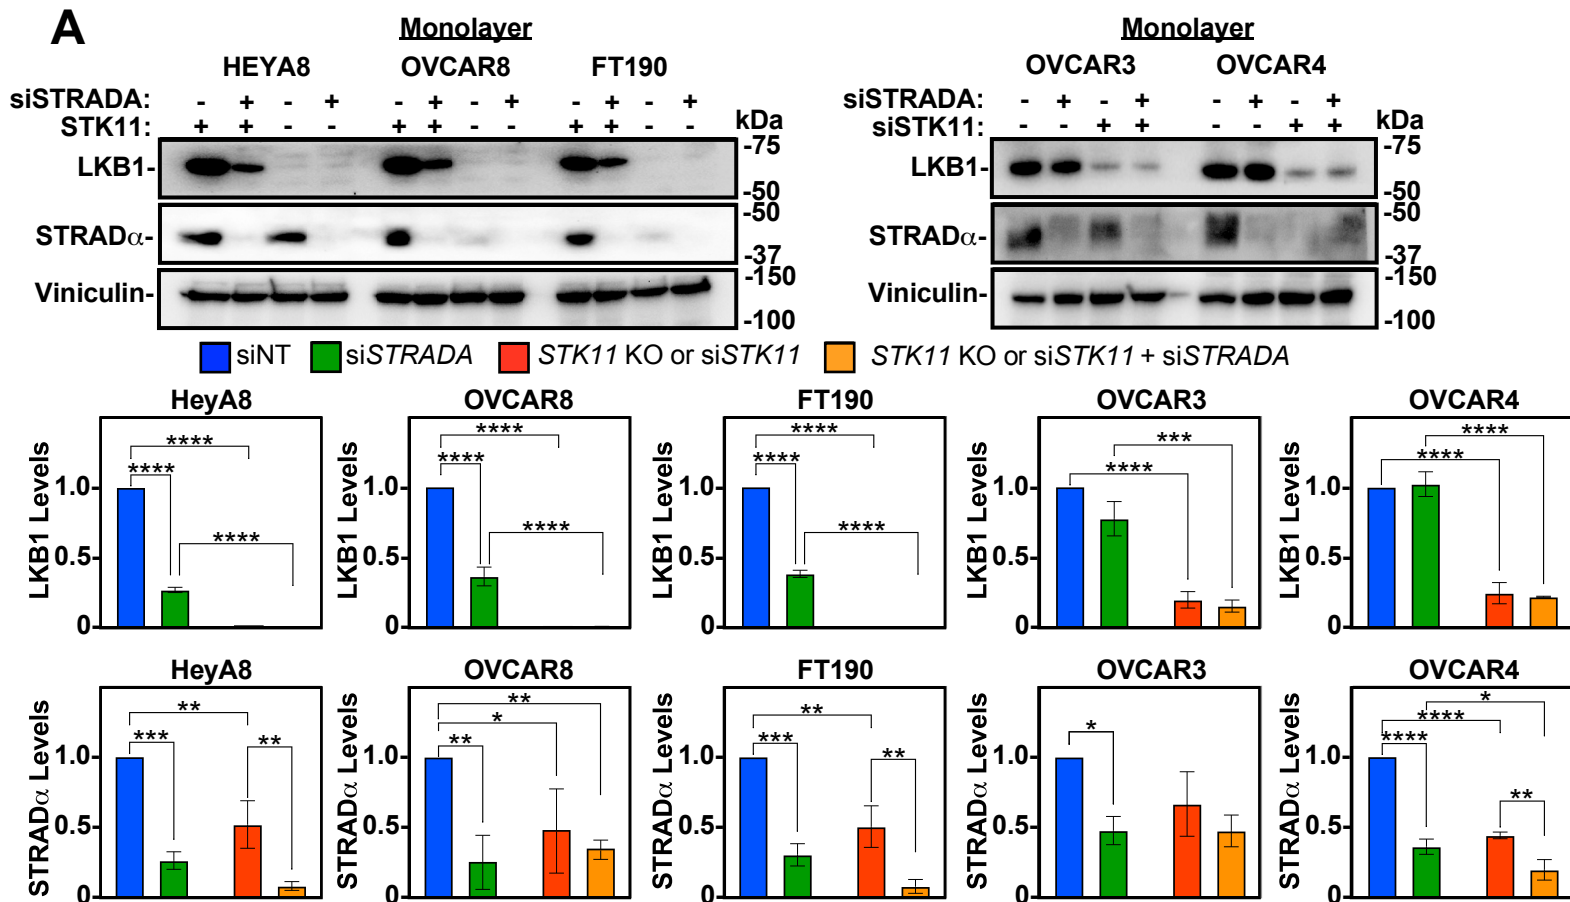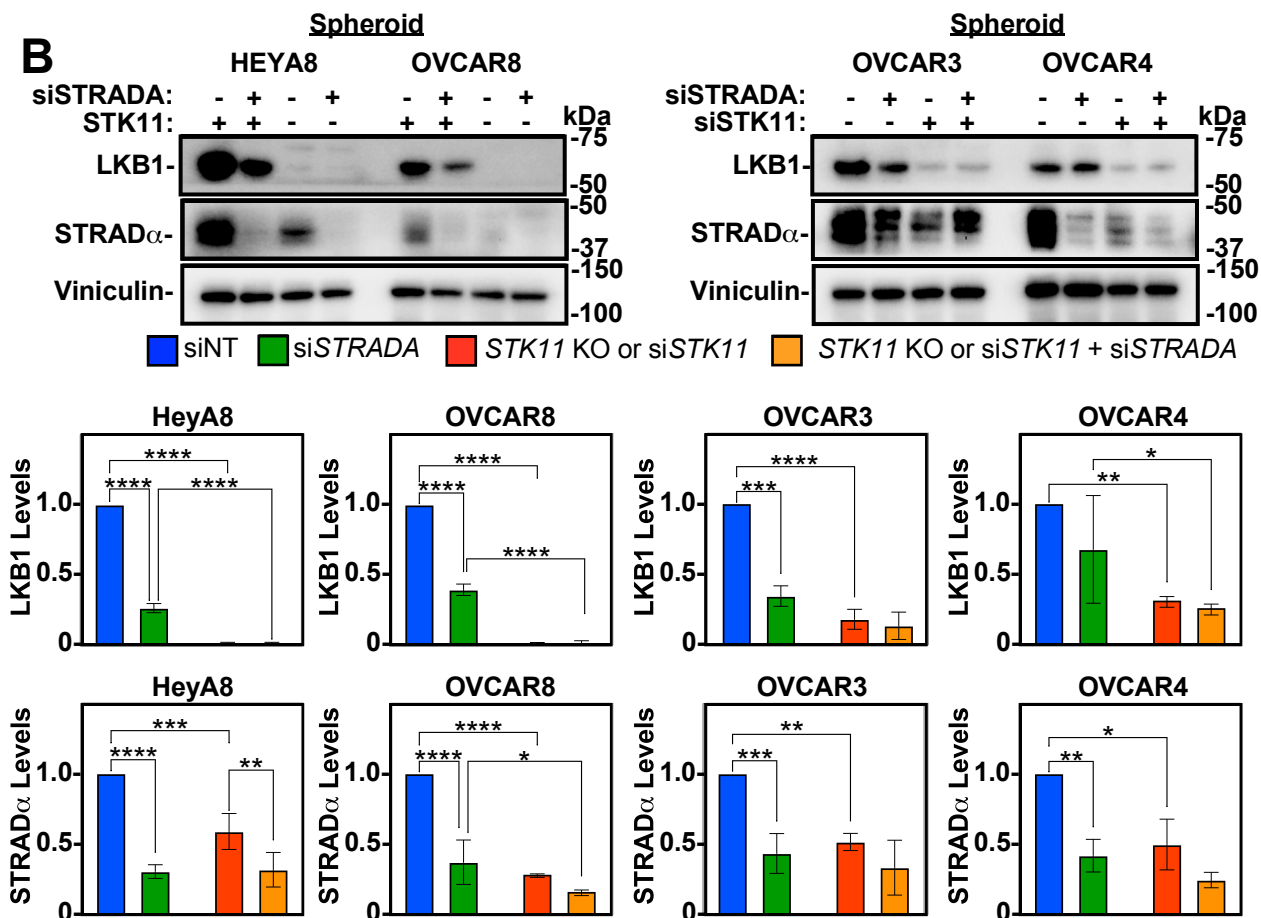

Supplemental Figure 1

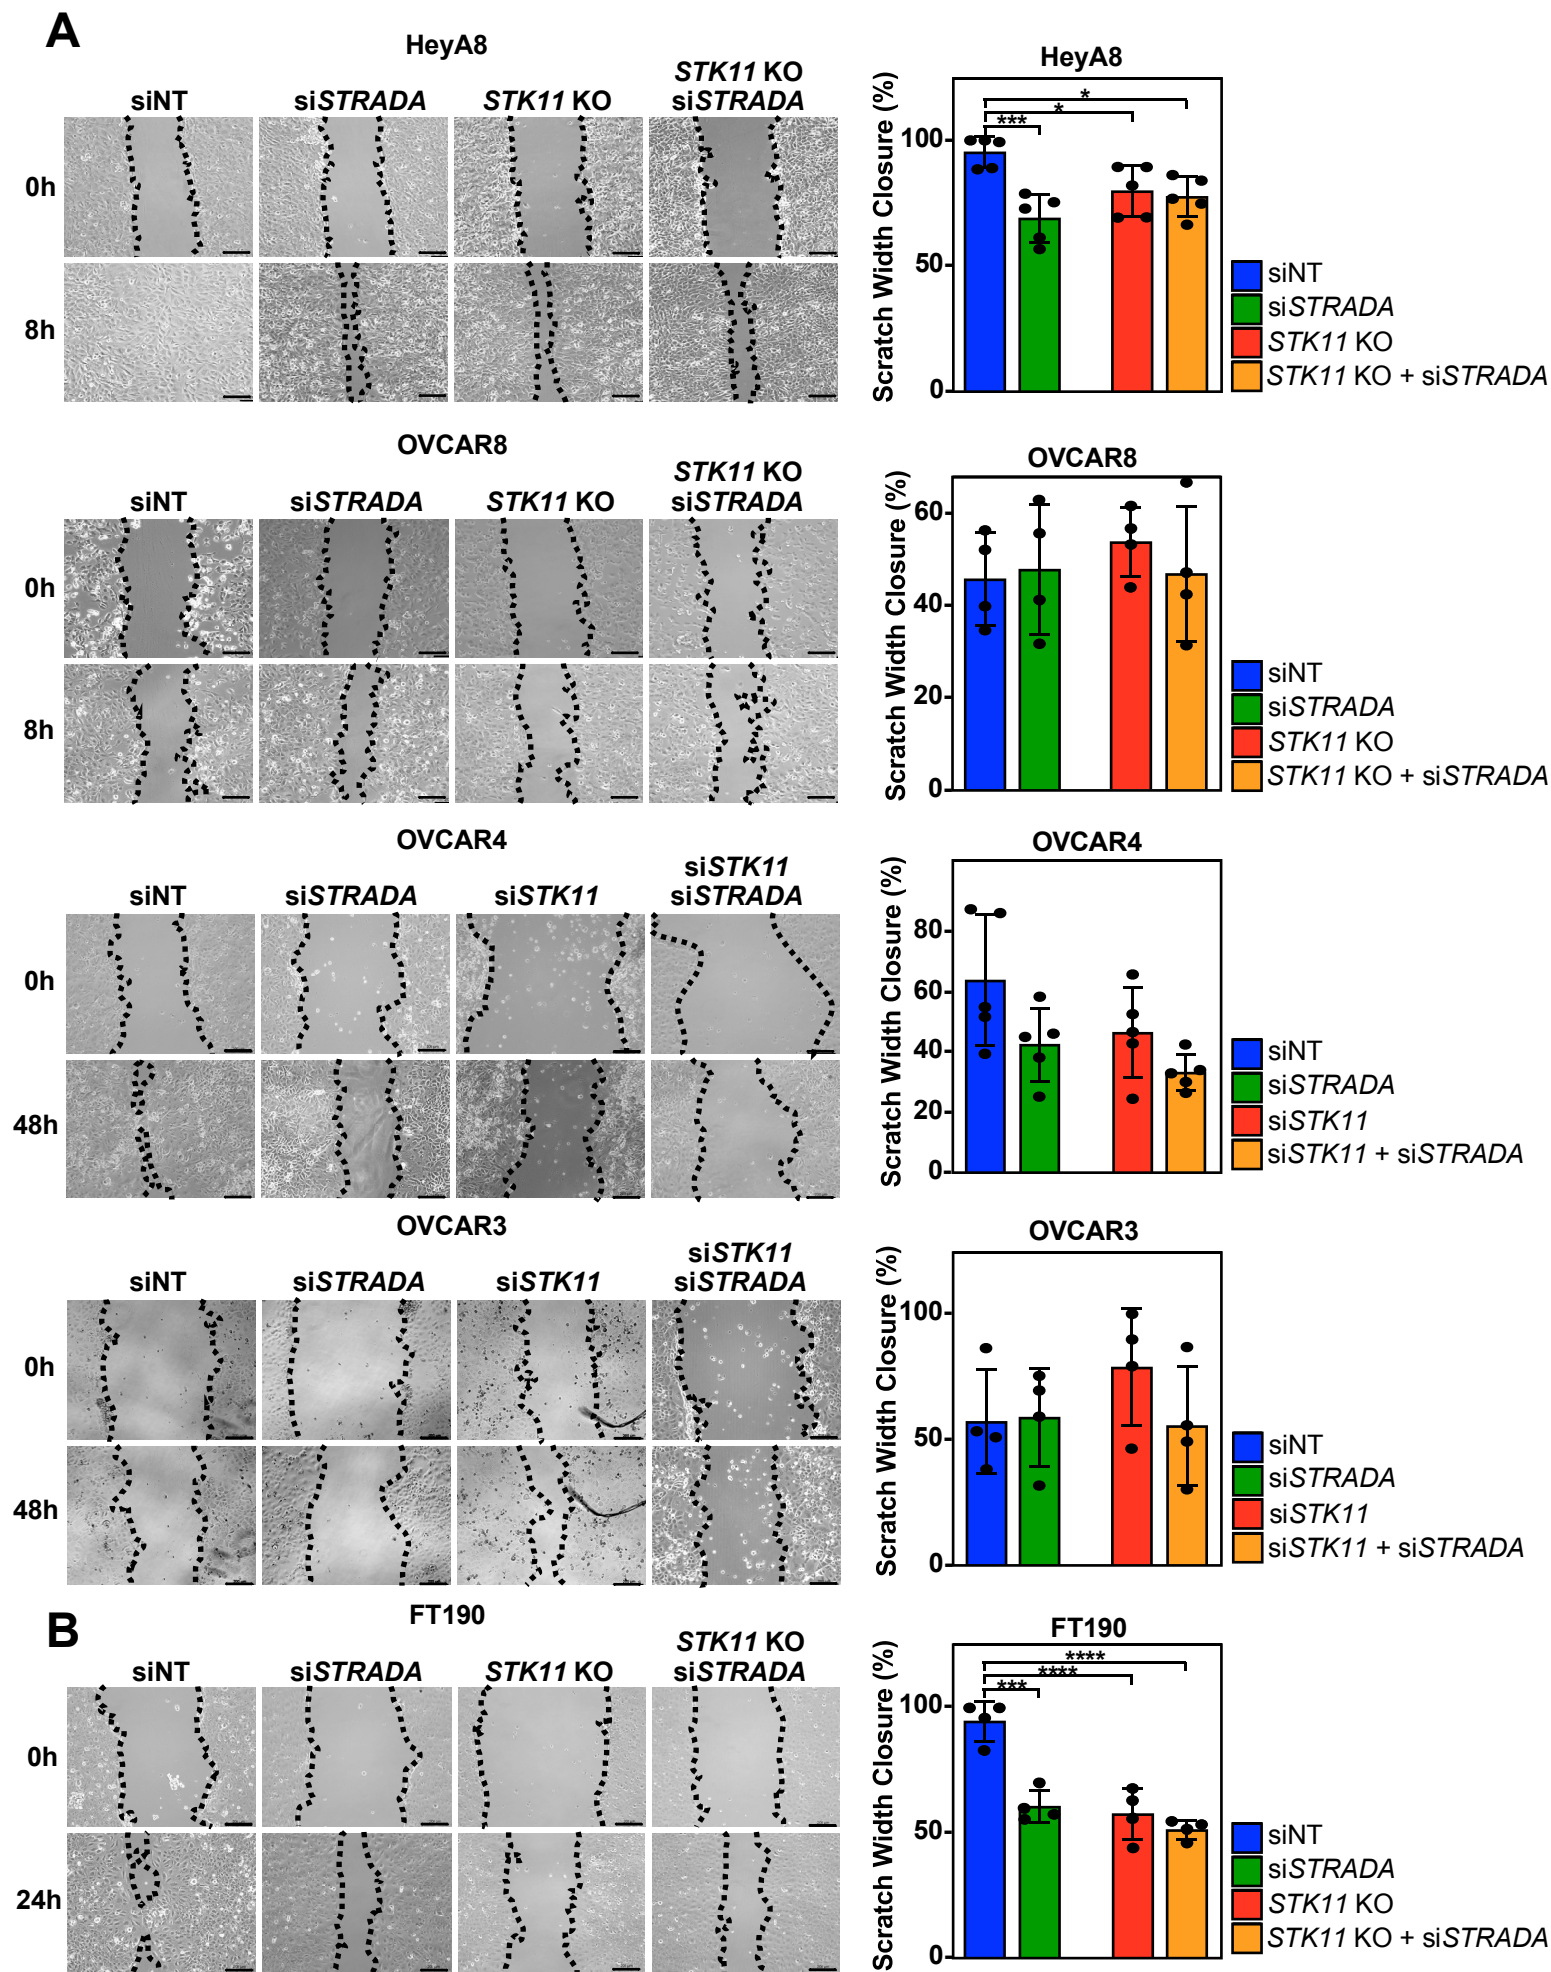

Supplemental Figure 2

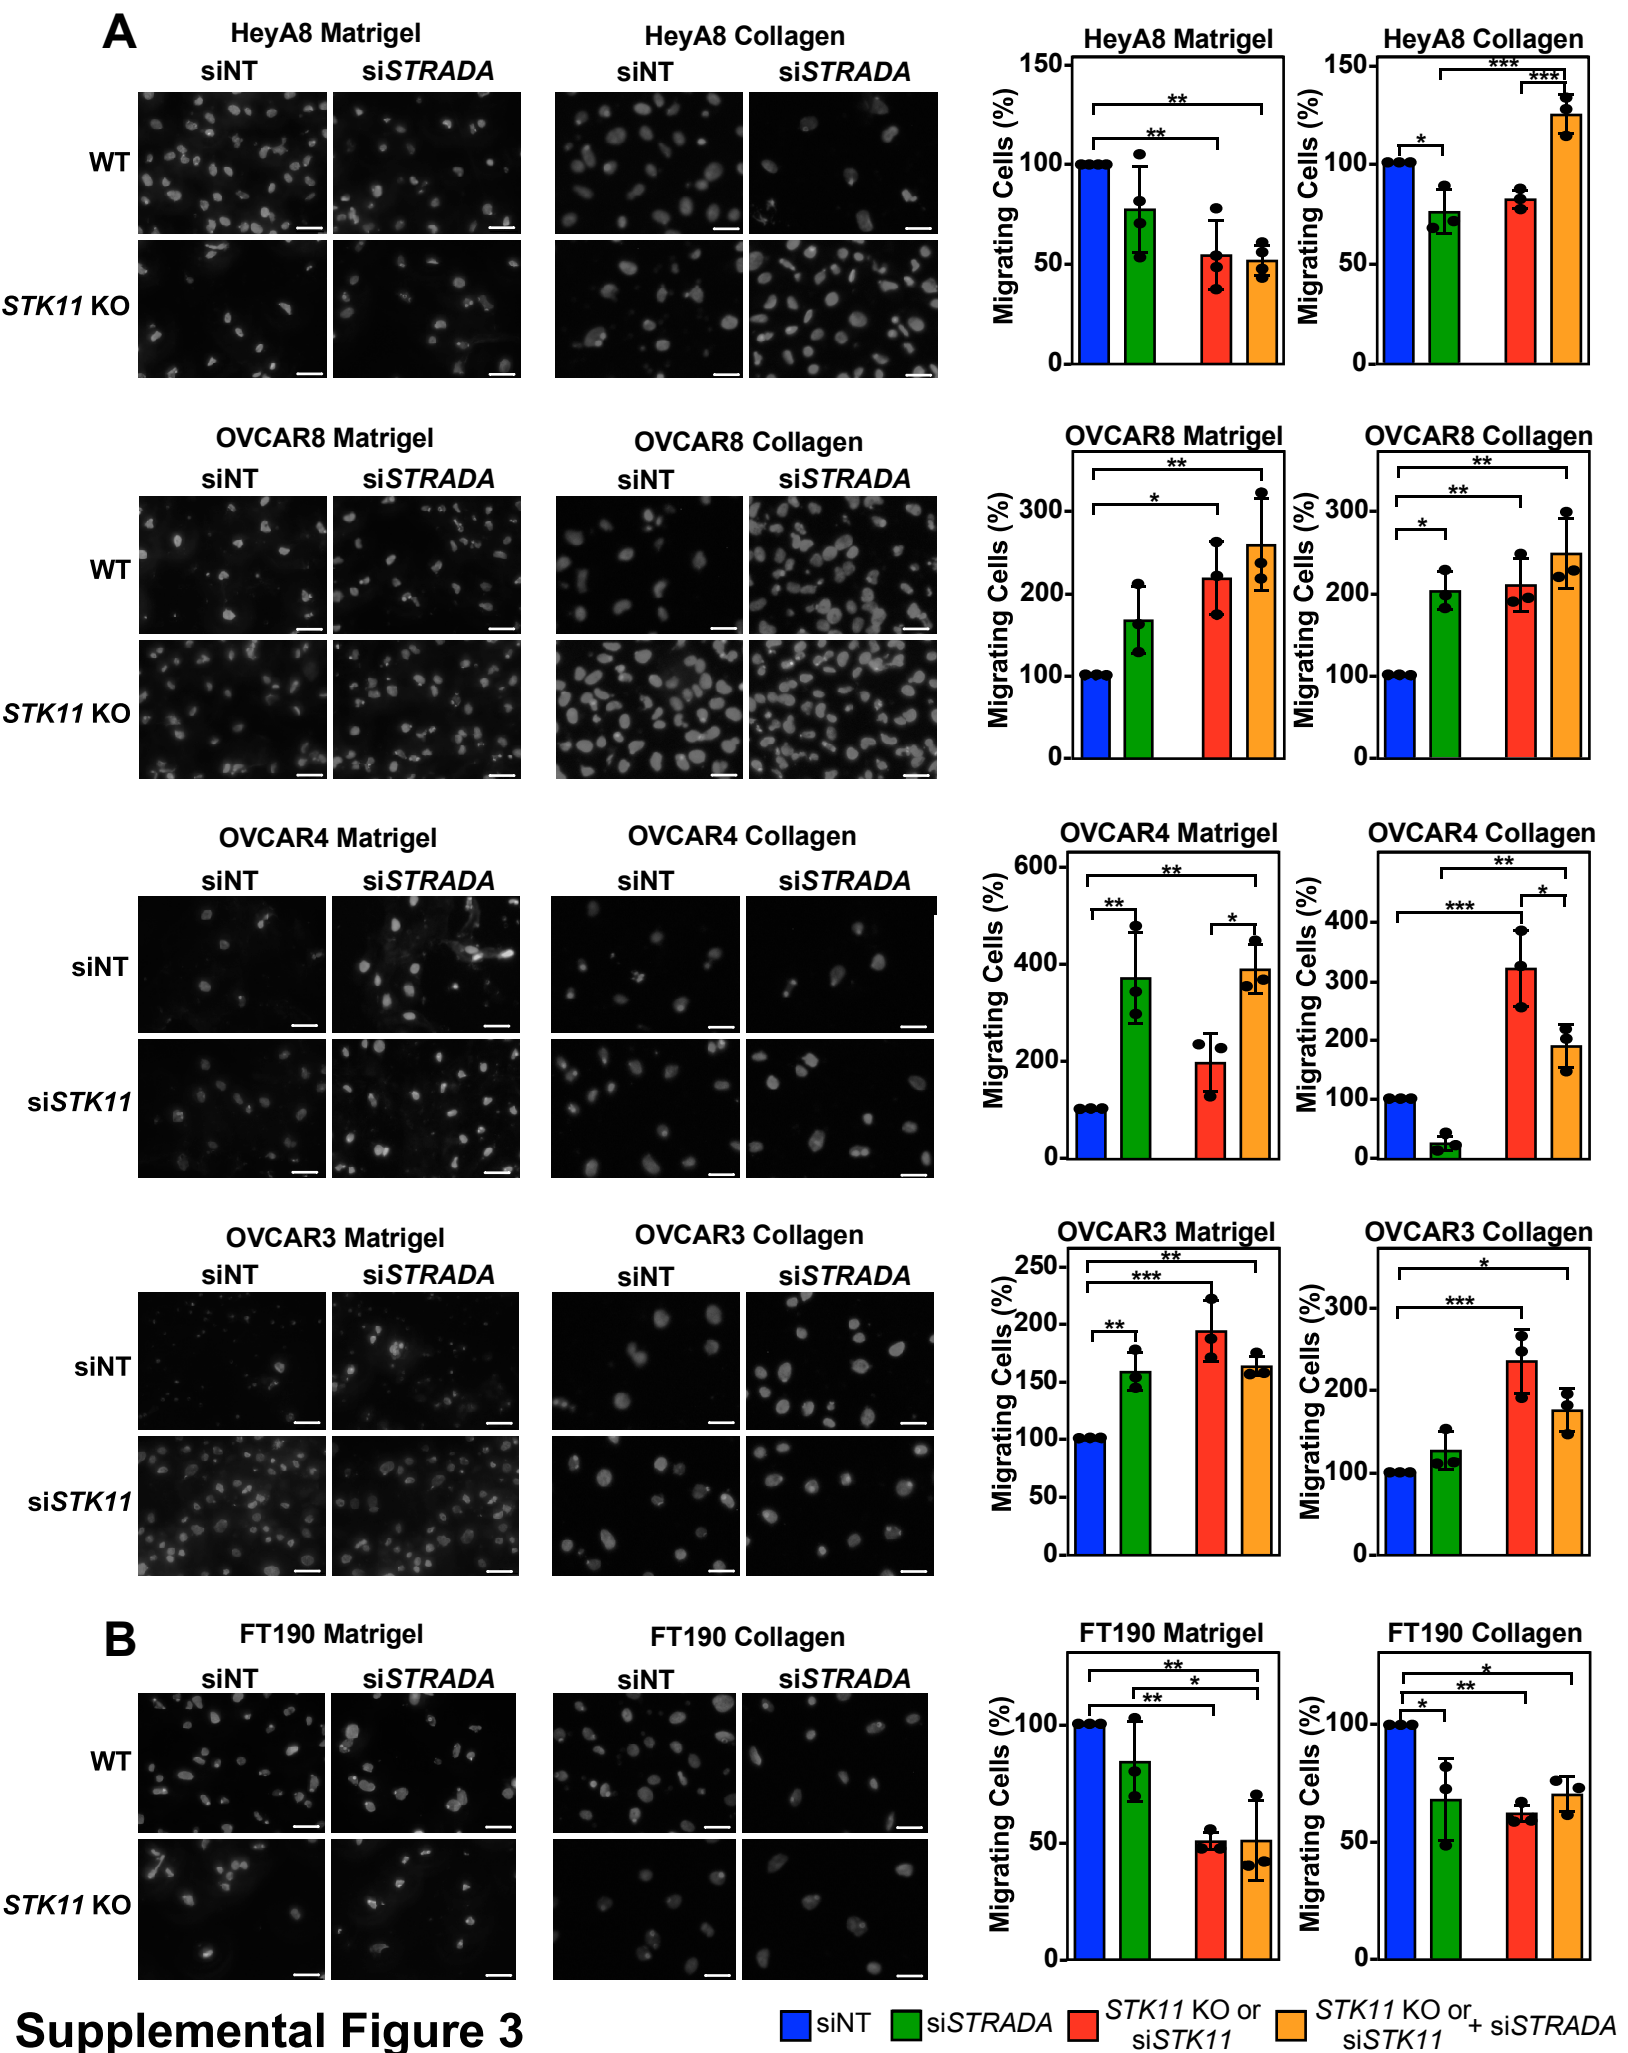



**A**

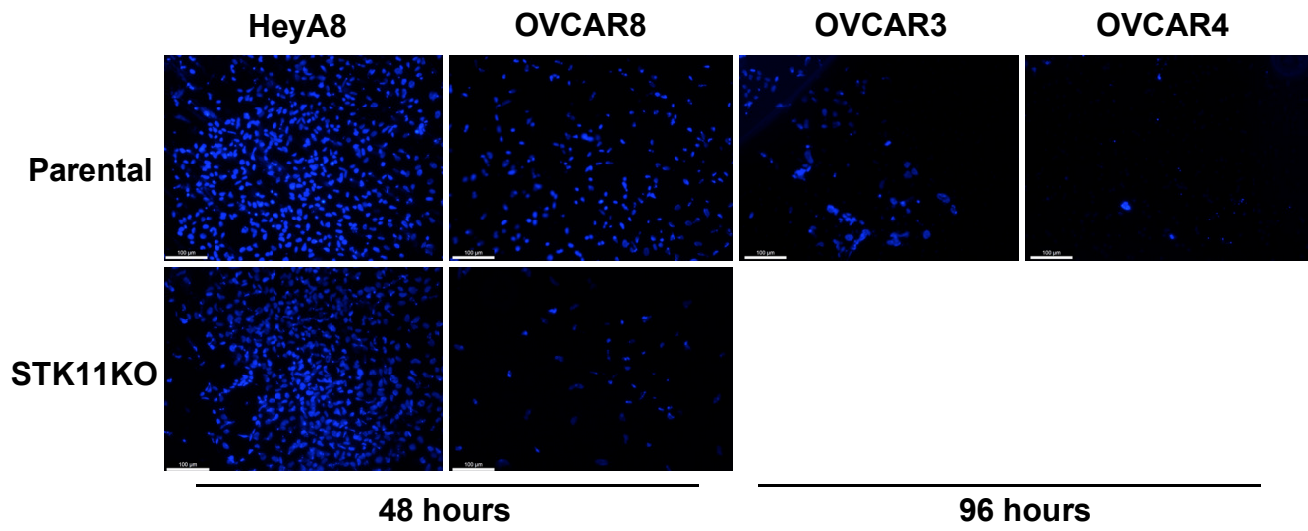

**B**

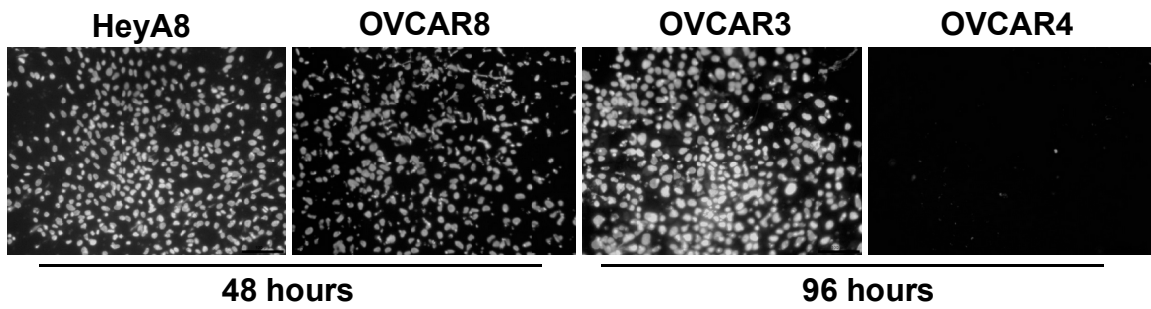

**Supplemental Figure 4**



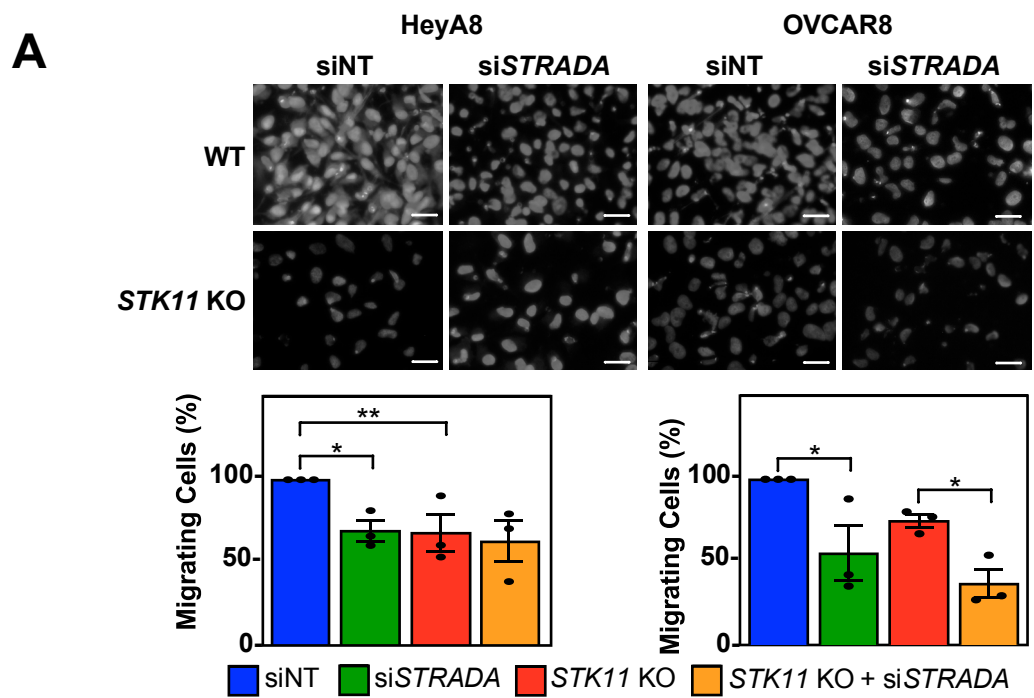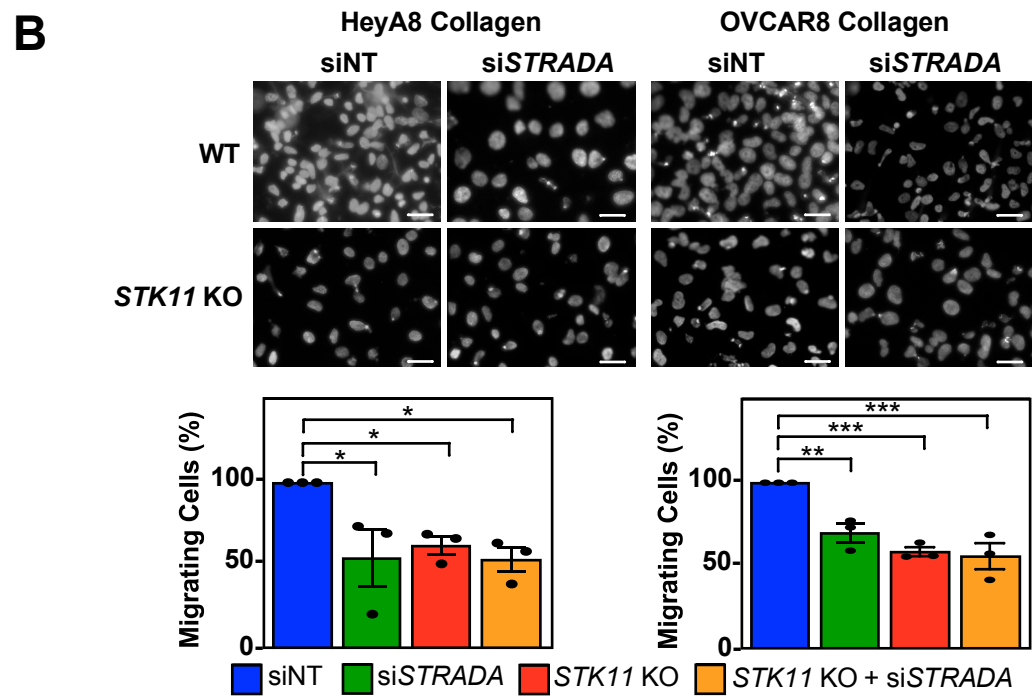

Supplemental Figure 5

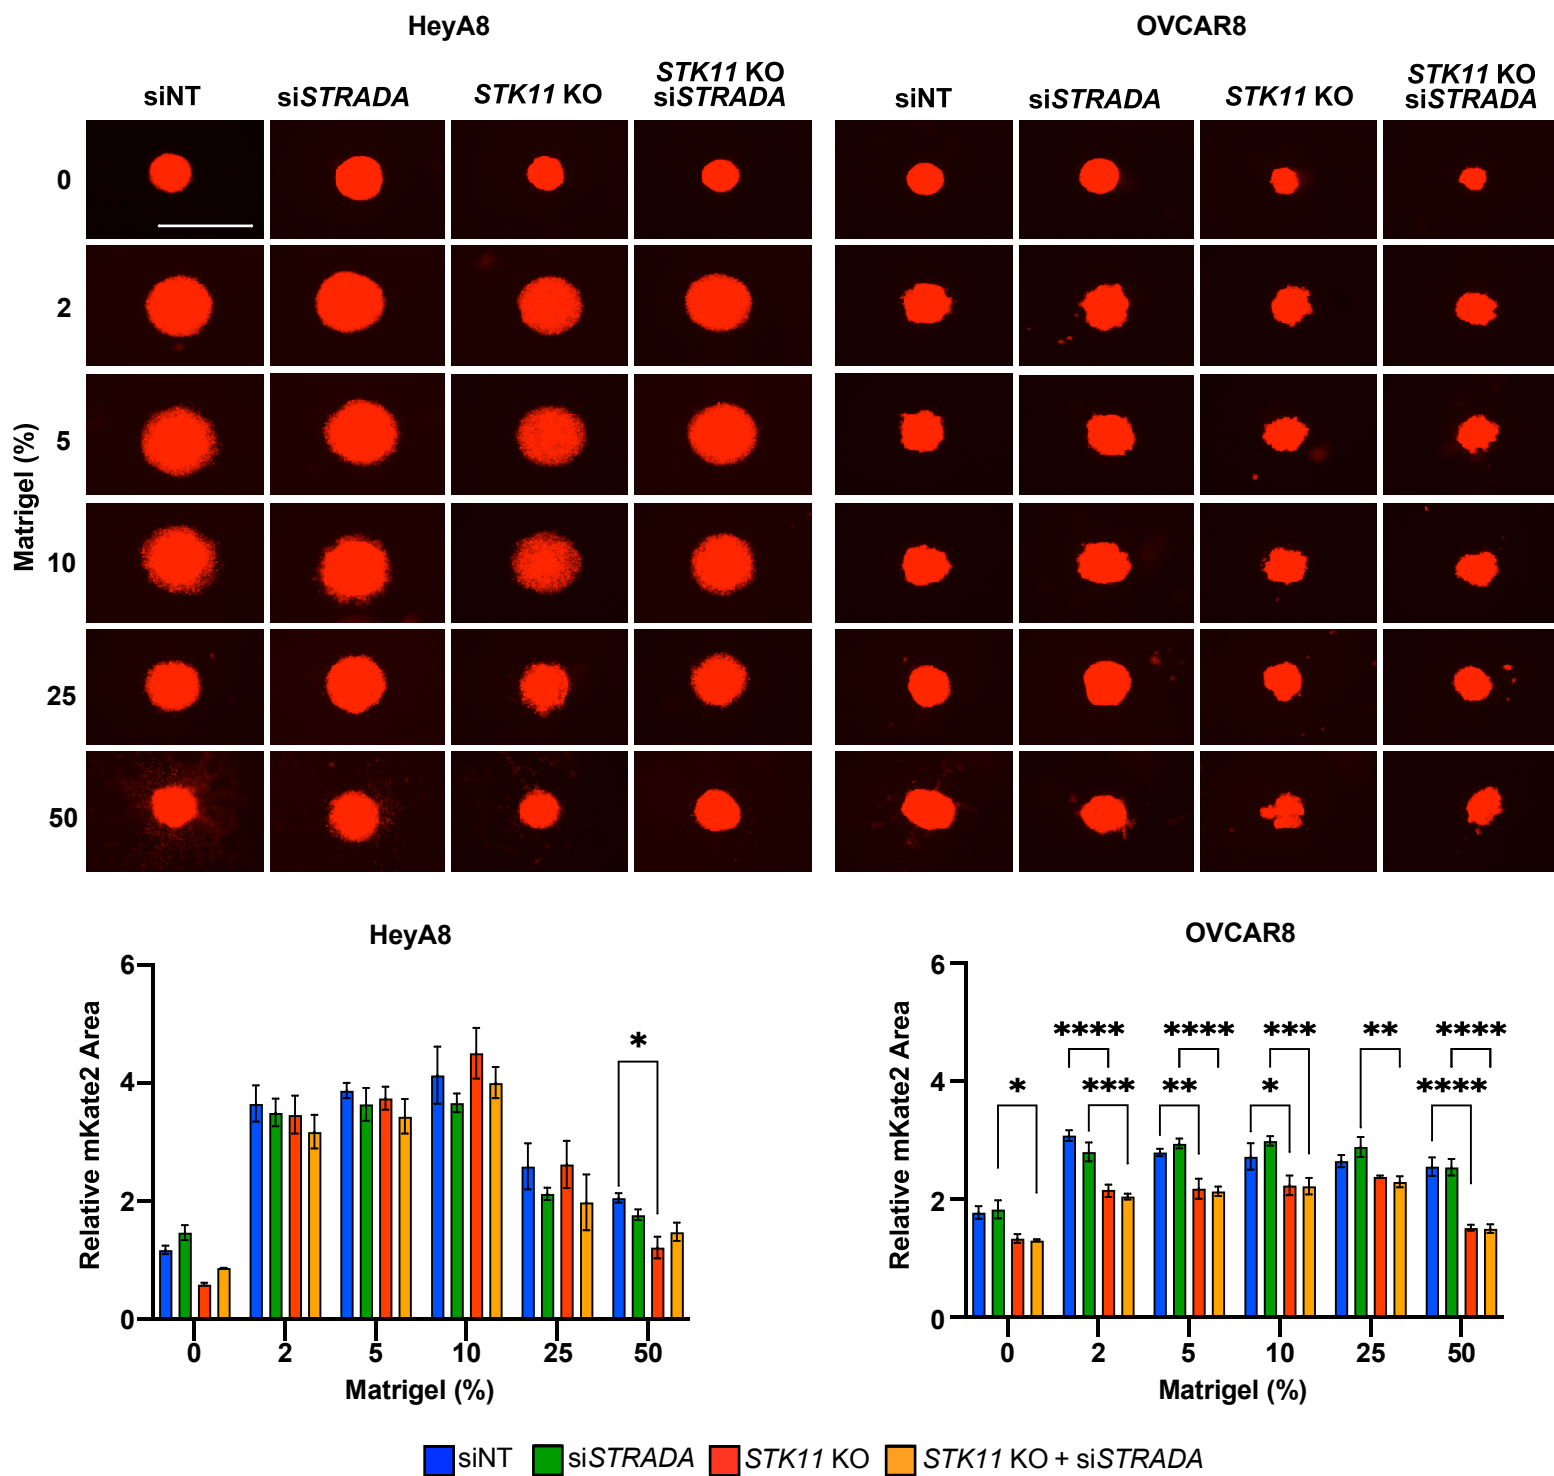

**Supplemental Figure 6**
